# Supplementary material for: Porous high specific surface area-activated carbon with co-doping N, S and P for high-performance supercapacitors
Source: Royal Society of Chemistry journal article supplement (doi:10.1039/c7ra07945a), 2017-01-01
Supplement: c7ra07945a1.pdf [file c7ra07945a1.pdf]

## **Electronic Supplementary Information**

**Porous high specific surface area activated carbon  
with co-doping N, S, P for high-performance  
supercapacitors**

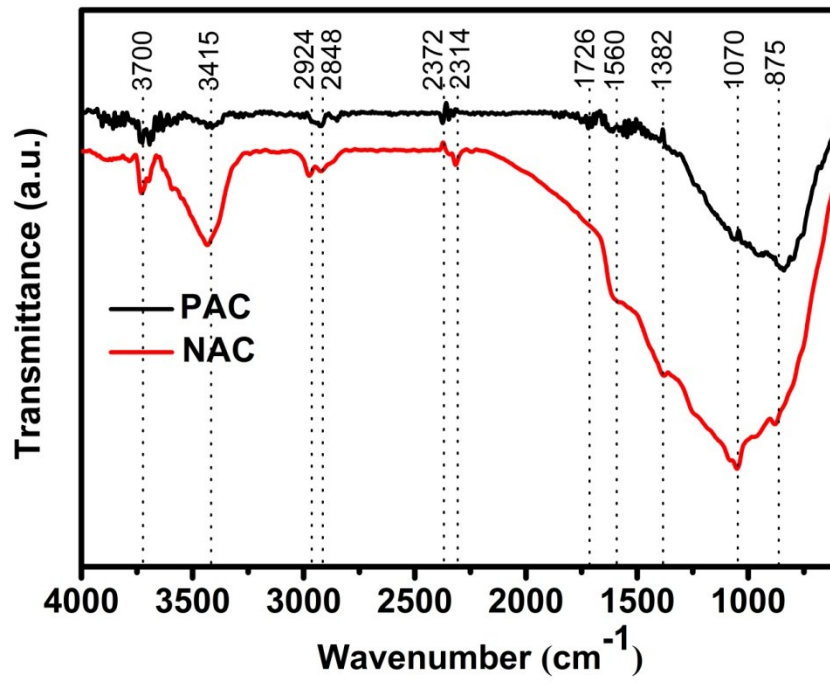

**Fig.S1** FTIR spectra for PAC and NAC.

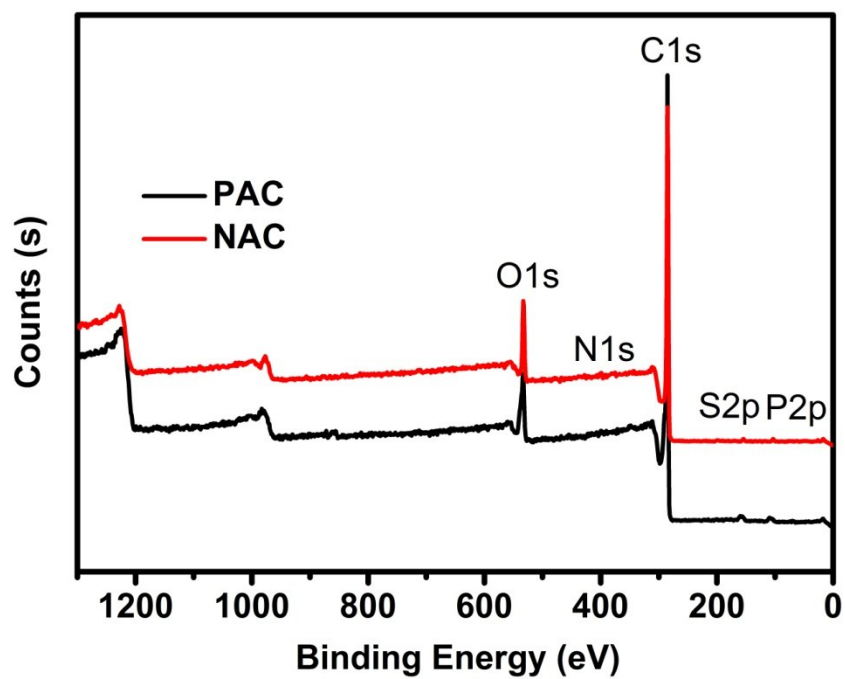

**Fig.S2** XPS spectra of PAC and NAC.

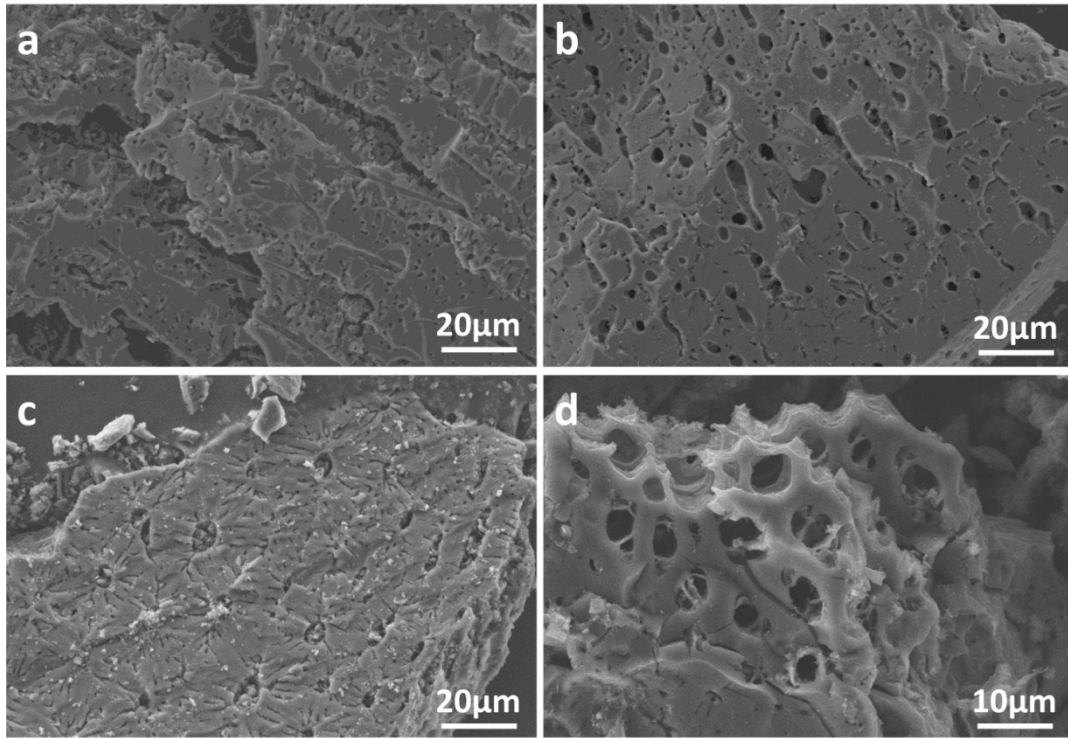

**Fig.S3** SEM images of (a) NAC and (b) PAC prepared from PKS carbonized material; (c) PKS carbonized material obtained after carbonization at 500 °C and (d) PAC after increasing the magnification.

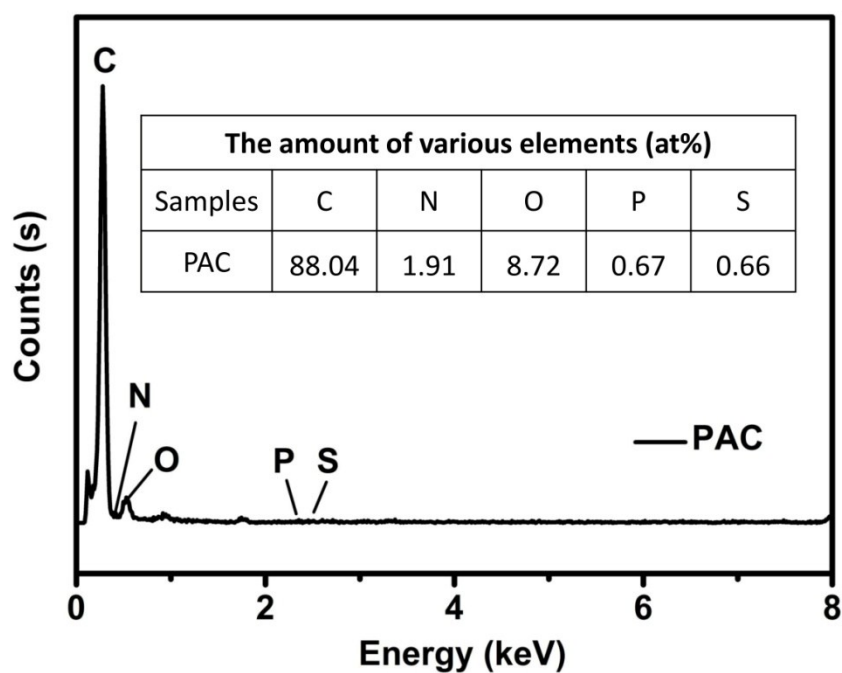

**Fig.S4** EDX spectra of PAC. And the inset in Fig.S4 shows detailed EDX elements analysis of the PAC samples.

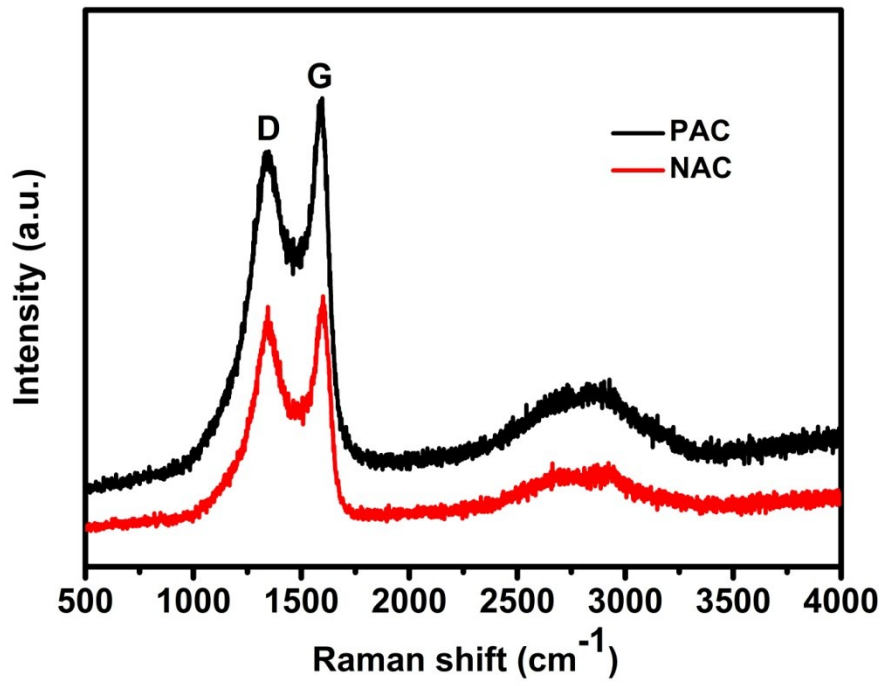

**Fig.S5** Raman spectroscopy showing prominent D and G peaks of PAC and NAC.

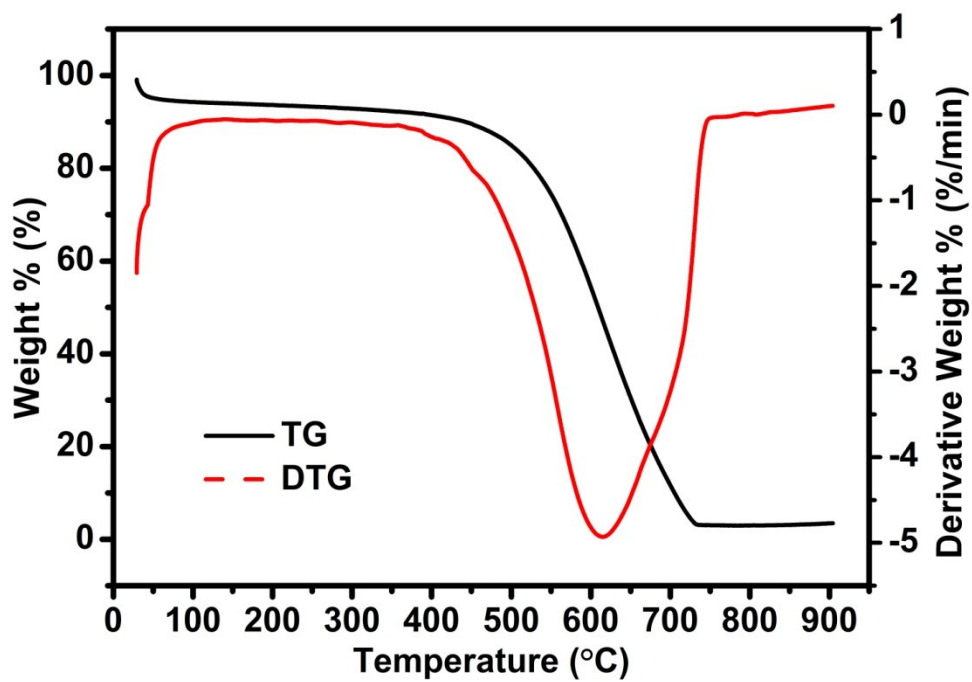

Fig.S6 TGA curve of the PAC.

**Table.S1** Textural and electrochemical properties of PKS derived activated carbons.

| Samples      | BET SSA ( $\text{m}^2 \text{g}^{-1}$ ) |           |      |            | Pore volume ( $\text{cm}^3 \text{g}^{-1}$ ) |           |      |            | $C_s^c$<br>( $\text{F g}^{-1}$ ) |
|--------------|----------------------------------------|-----------|------|------------|---------------------------------------------|-----------|------|------------|----------------------------------|
|              | Tota<br>l                              | Micr<br>o | Meso | Ratio<br>a | Tota<br>l                                   | Micr<br>o | Meso | Ratio<br>b |                                  |
| PAC-800      | 1964                                   | 698       | 1266 | 0.55       | 0.48                                        | 0.21      | 0.27 | 0.77       | 235                              |
| PAC-900      | 2760                                   | 886       | 1874 | 0.47       | 1.61                                        | 0.47      | 1.14 | 0.41       | 380                              |
| PAC-<br>1000 | 1327                                   | 517       | 810  | 0.64       | 0.54                                        | 0.41      | 0.13 | 3.15       | 108                              |

<sup>a</sup> The micropore area to mesopore area ratio.

<sup>b</sup> The micropore volume to mesopore volume ratio.

<sup>c</sup> The  $C_s$  values calculated from GC curves at a current density of  $1 \text{ A g}^{-1}$ , see Fig.S7.



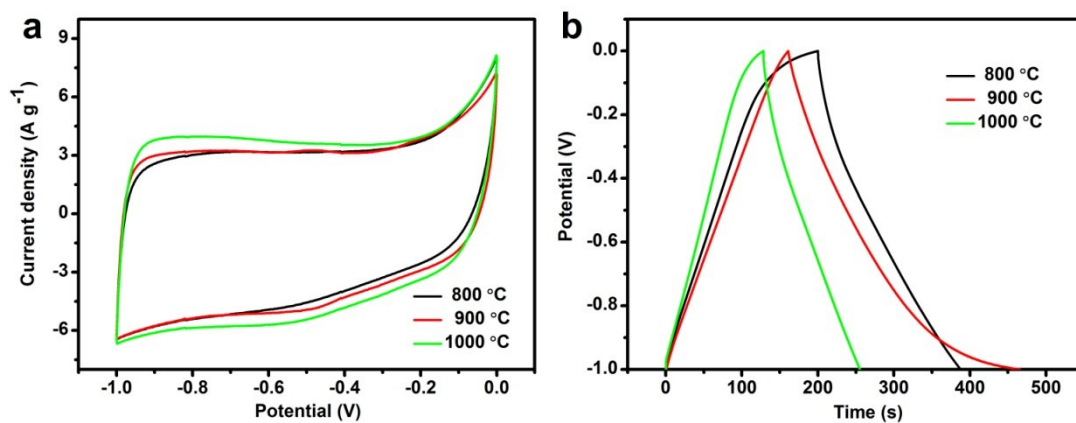

**Fig.S7** Comparison of (a) CV curves recorded at a scan rate of  $10 \text{ mV s}^{-1}$  in a 3 M KOH solution and (b) galvanostatic charge-discharge curves at a current density of  $1 \text{ A g}^{-1}$  in a 3 M KOH solution with different calcination temperatures (800 °C, 900 °C, 1000 °C).
